# Supplementary material for: Ionic liquid-assisted hydrothermal valorization and redox site engineering of spruce cone biowaste for high-performance heteroatom-doped and ceria-modified electrodes for sustainable supercapacitor applications
Source: Royal Society of Chemistry journal article supplement (doi:10.1039/d5ma00027k), 2025-01-01
Supplement: d5ma00027k1.pdf [file d5ma00027k1.pdf]

## Electronic Supplementary Information

### **Ionic Liquid-Assisted Hydrothermal Valorization and Redox Site Engineering of Spruce Cone Biowaste for High-Performance Heteroatom-Doped and Ceria-Modified Electrodes for Sustainable Supercapacitor Applications**

**Khadija Chaudhary<sup>a,b</sup>, Adeen Ilyas<sup>c</sup>, Tomáš Zelenka<sup>a</sup>, Hidetsugu Shiozawa<sup>b,d</sup> Muhammad Farooq Warsi<sup>e</sup>, Eric W. Cochran<sup>c\*</sup>, and Sonia Zulfiqar<sup>a,f\*</sup>,**

*<sup>a</sup>Department of Chemistry, Faculty of Science, University of Ostrava, 30. Dubna 22, Ostrava, 701 03, Czech Republic*

*<sup>b</sup>J. Heyrovsky Institute of Physical Chemistry, Czech Academy of Sciences, Dolejskova 3, 182 23 Prague 8, Czech Republic*

*<sup>c</sup>Department of Chemical and Biological Engineering, Iowa State University, Sweeney Hall, 618 Bissell Road, Ames, Iowa 50011, USA*

*<sup>d</sup>Faculty of Physics, University of Vienna, Boltzmannngasse 5, 1090 Vienna, Austria*

*<sup>e</sup>Institute of Chemistry, Baghdad-ul-Jadeed Campus, The Islamia University of Bahawalpur, Bahawalpur, 63100, Pakistan*

*<sup>f</sup>Department of Physical Sciences, Lander University, 320 Stanley Ave, Greenwood, South Carolina 29649, USA*

Corresponding authors: [ecochran@iastate.edu](mailto:ecochran@iastate.edu); [szulfiqar@lander.edu](mailto:szulfiqar@lander.edu)

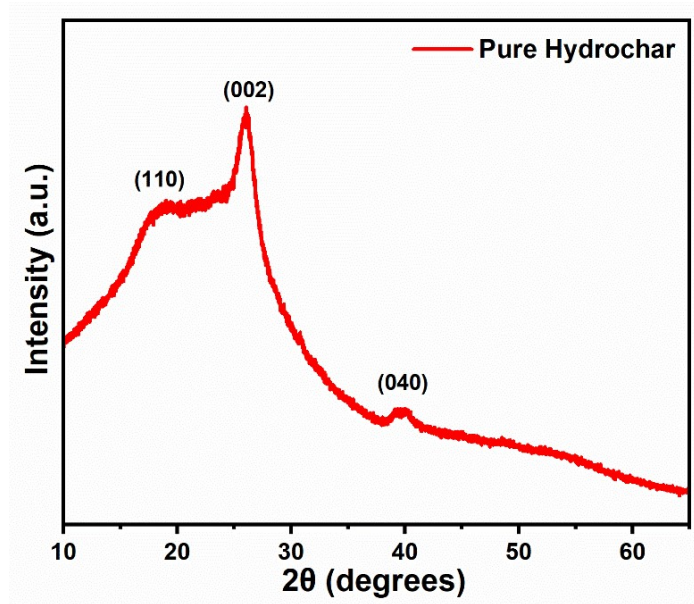

**Figure S1.** XRD pattern of pure hydrochar.

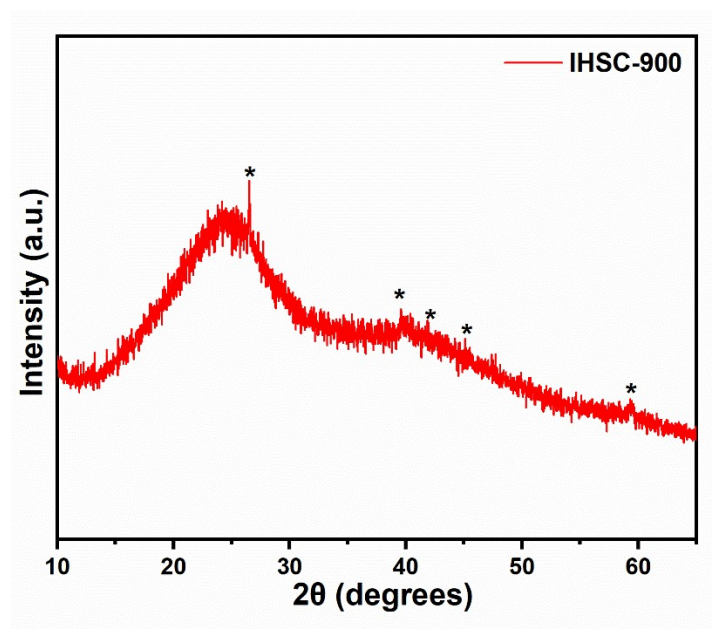

**Figure S2.** XRD pattern of IHSC-900 showing Fe impurities.

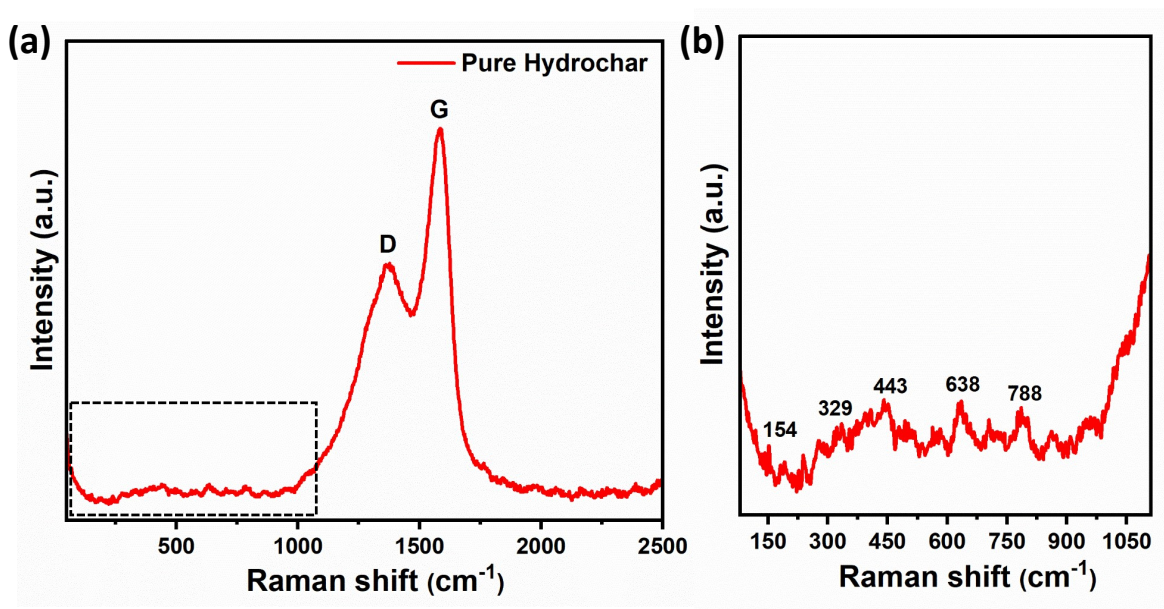

Figure S3. Raman spectrum of pure hydrochar.

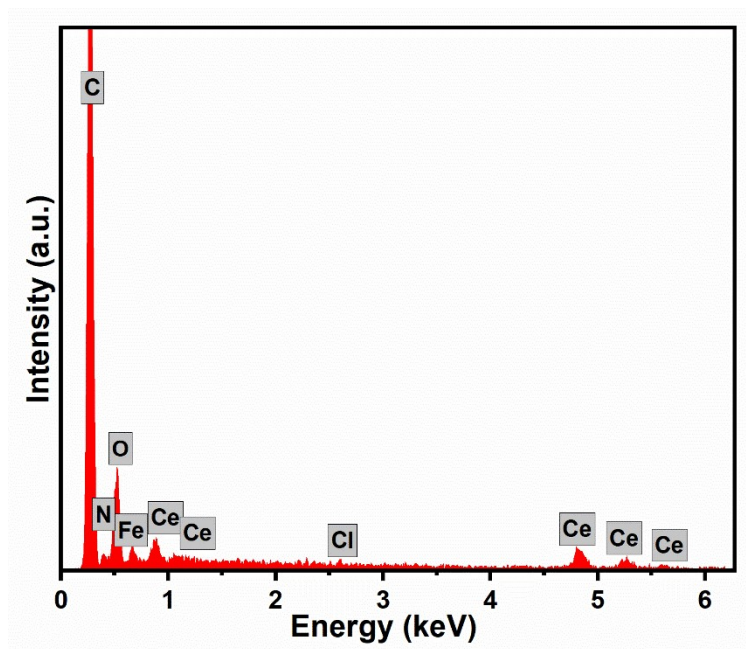

Figure. S4. EDX spectrum of Ce-IHSC-900.

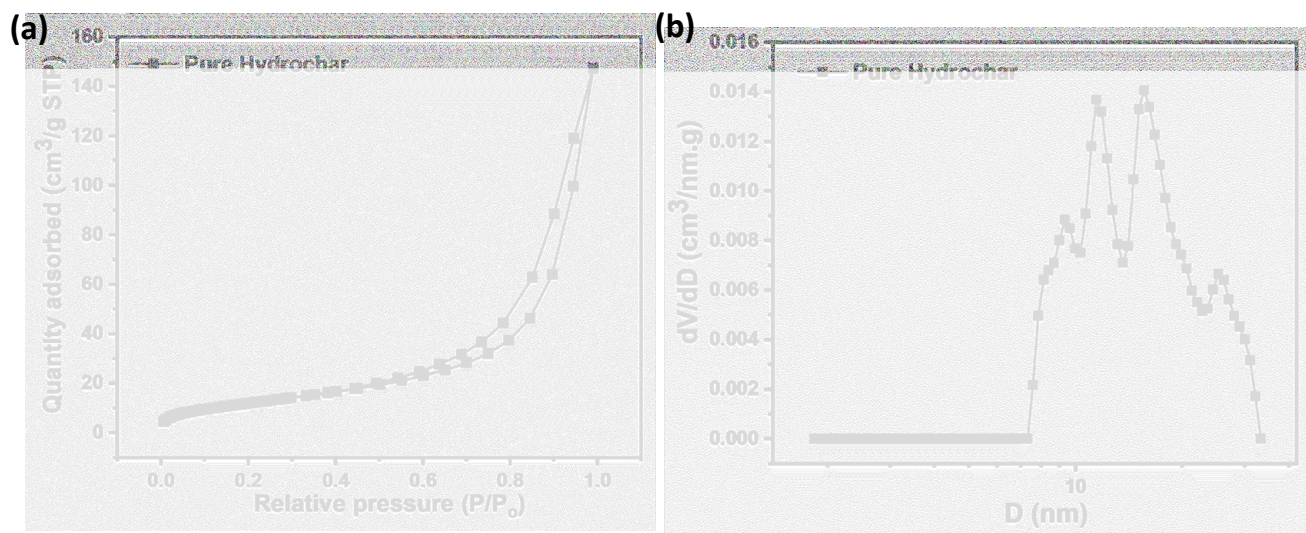

**Figure S5.** (a) N<sub>2</sub> adsorption-desorption plot (b) pore size distribution plot of pure hydrochar.

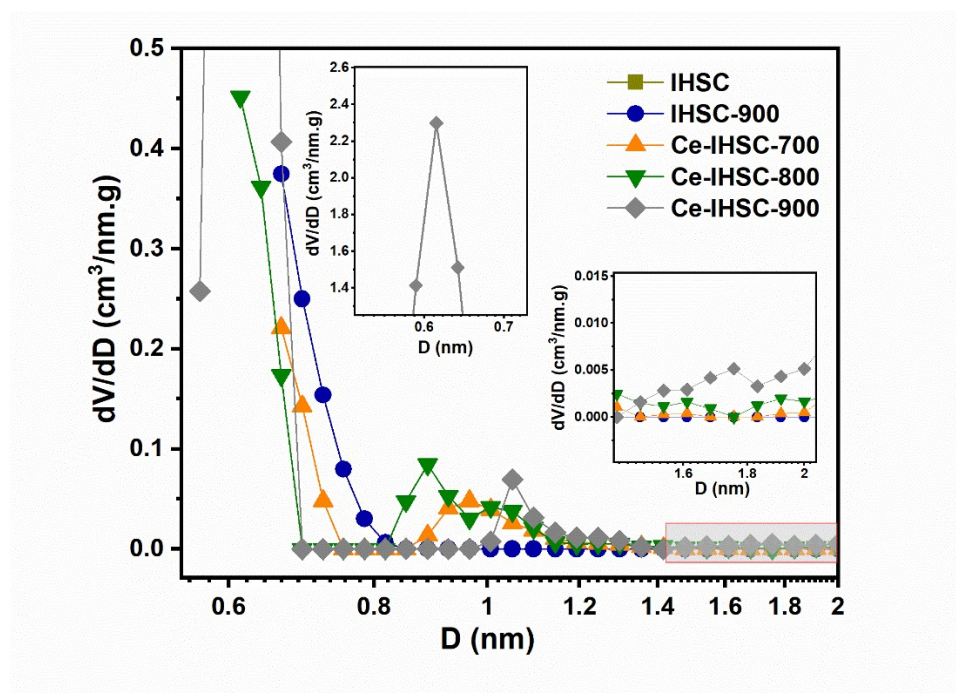

**Figure S6.** A close view of the micropore region of prepared hydrochars.



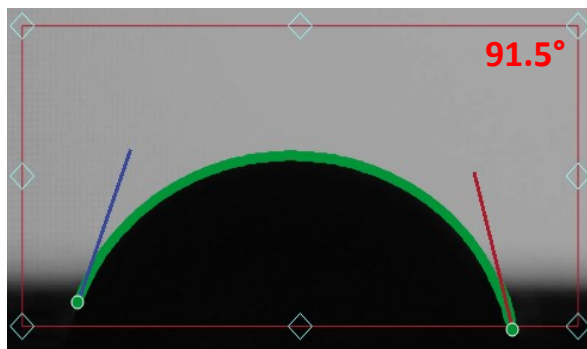

**Figure S7.** Contact angle among pure hydrochar and KOH electrolyte

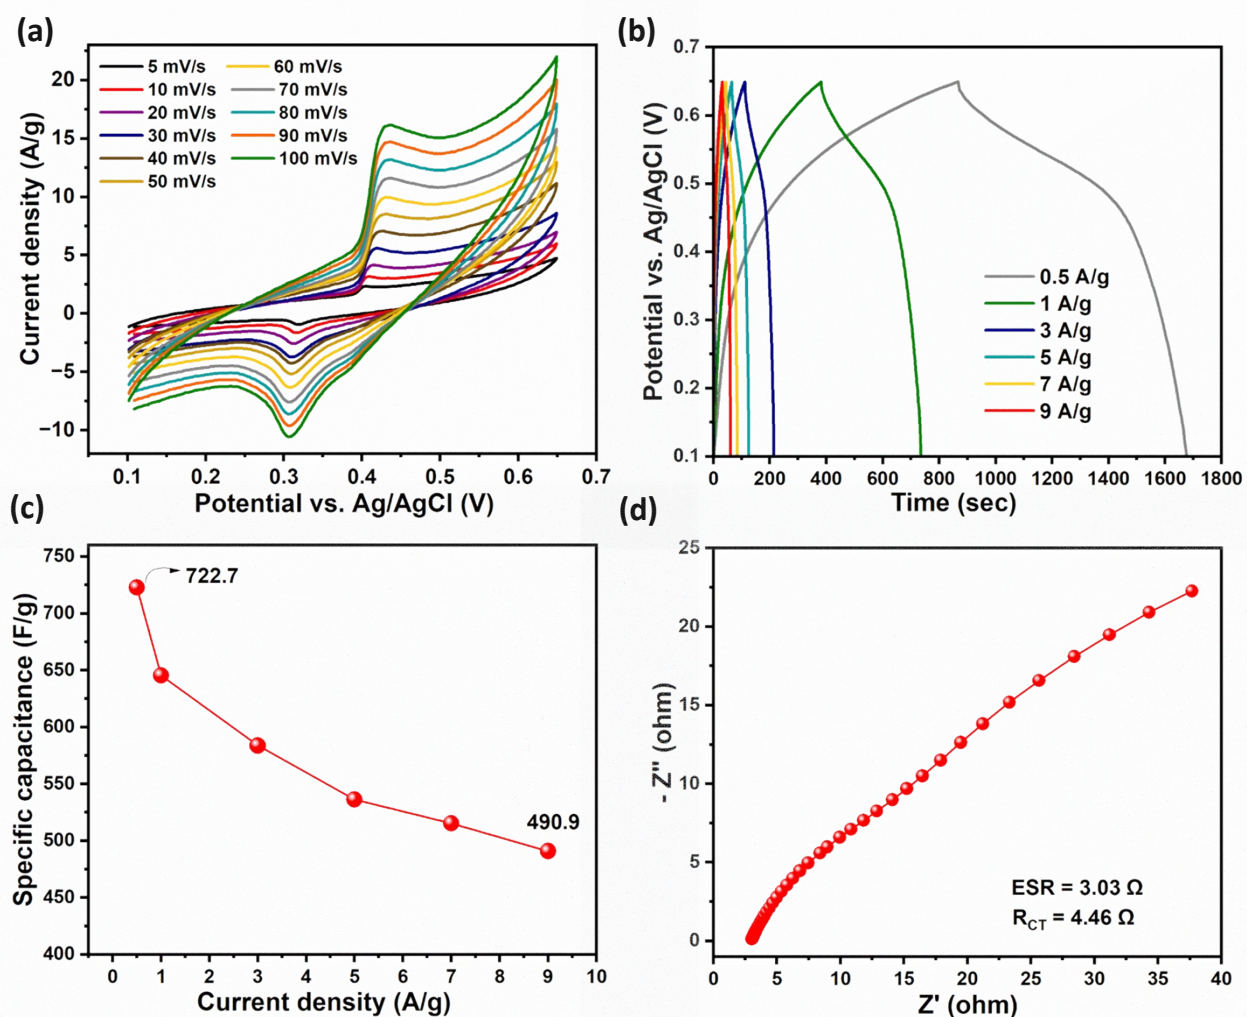

**Figure S8.** Electrochemical measurements of ceria modified hydrochar prepared in absence of [Bmim][FeCl<sub>4</sub>]: (a) CV profiles at different scan rates (5-100 mV/s), (b) GCD plots at various current densities (0.5-9 A/g), (c) plot showing specific capacitance at different current density, and (d) Nyquist plot derived from EIS.

**Table. S1.** Elemental composition of hydrochars.

| <b>Hydrochars</b> | <b>EDX Wt.%</b> |          |          |           |           |           |
|-------------------|-----------------|----------|----------|-----------|-----------|-----------|
|                   | <b>C</b>        | <b>O</b> | <b>N</b> | <b>Ce</b> | <b>Fe</b> | <b>Cl</b> |
| IHSC-900          | 74.6            | 21.22    | 1.24     | -         | 2.31      | 0.63      |
| Ce-IHSC-700       | 51.21           | 16.43    | 0.87     | 29.06     | 1.95      | 0.48      |
| Ce-IHSC-800       | 53.29           | 14.4     | 0.92     | 28.87     | 1.97      | 0.55      |
| Ce-IHSC-900       | 56.69           | 10.31    | 1.19     | 29.13     | 2.09      | 0.59      |

**Table S2.** Comparison of specific electrochemical performance of our synthesized hydrochar with already reported biomass-derived carbon electrodes.

| Material                           | Metal Oxide                    | Carbon source       | Specific capacitance | Cyclic stability           | Reference |
|------------------------------------|--------------------------------|---------------------|----------------------|----------------------------|-----------|
| <b>Ce-IHSC-900</b>                 | CeO <sub>2</sub>               | Spruce cone         | 992.7 F/g at 0.5 A/g | 95.2% after 7000 cycles    | This work |
| ITC-JG-900                         | -                              | Juggan Grass        | 336 F/g at 1 A/g     | 88% after 2000 cycles      | [1]       |
| HC-MgO-700                         | MgO                            | Hazelnut shells     | 323 F/g at 1 A/g     | 80% after 4000 cycles      | [2]       |
| RSN-700                            | -                              | Rice Straw          | 400 F/g at 0.1 A/g   | 94.6% after 10,000 cycles  | [3]       |
| H-SDC-A650                         | -                              | Soybean             | 435 F/g at 0.5 A/g   | 91% after 10,000 cycles    | [4]       |
| N-PCNS                             | -                              | Lactose monohydrate | 263 F/g at 1 A/g     | 96% after 10,000 cycles    | [5]       |
| CPA-35-150                         | NiO-CoO                        | Corn cob            | 208.5 F/g at 1 A/g   | 97.2 after 20,000 cycles   | [6]       |
| MnO <sub>2</sub> -BP@PAni          | MnO <sub>2</sub>               | Banana Peel         | 512.8 F/g 1 A/g      | 86.89% after 10,000 cycles | [7]       |
| BPC/Fe <sub>2</sub> O <sub>3</sub> | Fe <sub>2</sub> O <sub>3</sub> | Wheat straw         | 987.9 F/g 1 A/g      | 82.6% after 3000 cycles    | [8]       |
| NiNF@TBC                           | Ni(OH) <sub>2</sub>            | Tea leaves          | 945 F/g 1 A/g        | 95% after 10,000 cycles    | [9]       |
| NiO@PC                             | NiO                            | Wheat husk          | 849 F/g 3 A/g        | 78% after 8000 cycles      | [10]      |

## References

1. Liu, Y., et al., *Biomass-derived hierarchical porous carbons: boosting the energy density of supercapacitors via an ionothermal approach*. Journal of Materials Chemistry A, 2017. **5**(25): p. 13009-13018.
2. Sinan, N. and E. Unur, *Hydrothermal conversion of lignocellulosic biomass into high-value energy storage materials*. Journal of energy chemistry, 2017. **26**(4): p. 783-789.
3. Jin, H., et al., *Three-dimensional interconnected porous graphitic carbon derived from rice straw for high performance supercapacitors*. Journal of Power Sources, 2018. **384**: p. 270-277.
4. Li, Z., et al., *Sustainable biowaste strategy to fabricate dual-doped carbon frameworks with remarkable performance for flexible solid-state supercapacitors*. Journal of Power Sources, 2019. **418**: p. 112-121.
5. Wang, Z., et al., *Large-scale fabrication of N-doped porous carbon nanosheets for dye adsorption and supercapacitor applications*. Nanoscale, 2019. **11**(18): p. 8785-8797.
6. Ai, J., et al., *Corn cob cellulose-derived hierarchical porous carbon for high performance supercapacitors*. Journal of Power Sources, 2021. **484**: p. 229221.
7. Hamadi, F.Z., et al., *Synthesis and performance evaluation of supercapacitor based on banana peel-derived biochar loaded manganese dioxide with polyaniline ternary composite*. Ionics, 2024: p. 1-14.
8. Fang, K., et al., *Decorating biomass-derived porous carbon with Fe<sub>2</sub>O<sub>3</sub> ultrathin film for high-performance supercapacitors*. Electrochimica Acta, 2018. **261**: p. 198-205.
9. Khedulkar, A.P., et al., *Flower-like nickel hydroxide@ tea leaf-derived biochar composite for high-performance supercapacitor application*. Journal of colloid and interface science, 2022. **623**: p. 845-855.
10. Zhang, S., et al., *NiO nanosheets anchored on honeycomb porous carbon derived from wheat husk for symmetric supercapacitor with high performance*. Journal of Alloys and Compounds, 2018. **735**: p. 1722-1729.
